# Supplementary material
Source: PubMed Central journal article supplement (PMC2981389)
Supplement: supp_mol.110.065185_Suppementdata-MP.pdf [file supp_mol.110.065185_Suppementdata-MP.pdf]

**SUPPLEMENTARY DATA** for “Synergistically enhanced CYP2B6 Inducibility between a Polymorphic Mutation in CYP2B6 Promoter and PXR Activation” by Haishan Li, Stephen S. Ferguson, and Hongbing Wang. *Molecular Pharmacology*

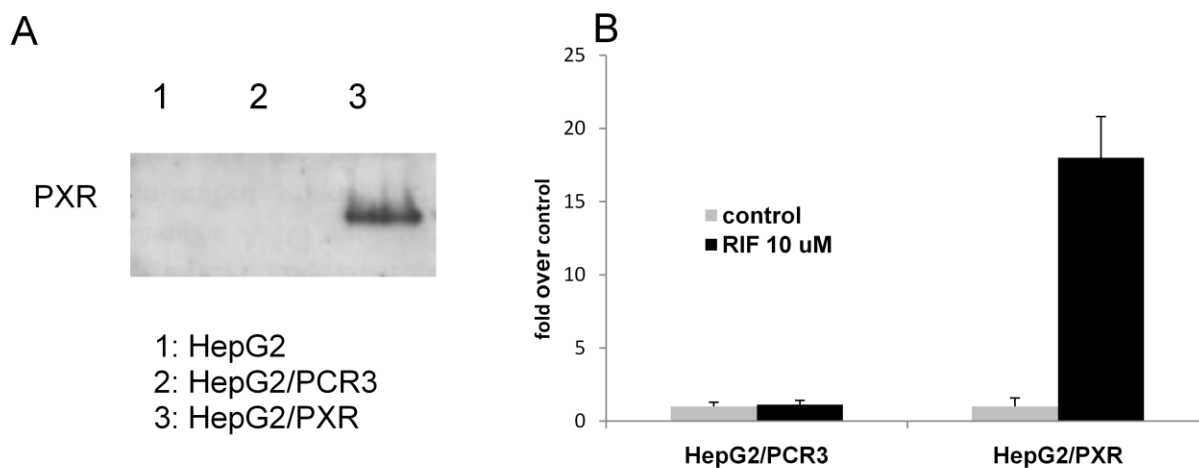

**Figure S1** Functional evaluation of HepG2 cell stable line transfected with human PXR expression vector (pCR3-hPXR). *A*, Whole cell homogenates isolated from HepG2 cells (1), HepG2 transfected with empty pCR3 vector (2), and HepG2 cells transfected with pCR3-hPXR (3) were separated on NuPAGE Novex 4–12% Bis-Tris gel and analyzed with PXR immunoblotting. *B*, HepG2/pCR3 and HepG2/hPXR cell lines were transfected with CYP3A4-XREM/PXRE luciferase vector and pRL-TK vector. Twenty-four hours after transfection, cells were treated with vehicle control (0.1% DMSO) or rifampicin (10  $\mu$ M). Dual-luciferase activities were measured as described in *Materials and Methods*.

**Table S1** Human liver donor information and RIF-mediated induction of CYP2B6 mRNA or bupropion hydroxylation.

| Donor number  | Age (year) | Sex      | Race             | Genotype CYP2B6-82 | Induction of CYP2B6 (RIF over control) |                                   |
|---------------|------------|----------|------------------|--------------------|----------------------------------------|-----------------------------------|
|               |            |          |                  |                    | mRNA                                   | Activity (pmol/min/million cells) |
| HL-1          | 80         | M        | Caucasian        | TT                 | 10±0.8                                 | N/A                               |
| <b>HL-2</b>   | <b>48</b>  | <b>F</b> | <b>Caucasian</b> | <b>TC</b>          | <b>30±2.2</b>                          | N/A                               |
| HL-3          | 70         | F        | Caucasian        | TT                 | 6±0.6                                  | N/A                               |
| HL-4          | 72         | M        | Caucasian        | TT                 | 3±0.3                                  | N/A                               |
| HL-5          | 50         | F        | Caucasian        | TT                 | 10±1.5                                 | N/A                               |
| HL-6          | 61         | M        | N/A              | TT                 | 6±0.5                                  | N/A                               |
| HL-7          | 45         | F        | Caucasian        | TT                 | 5±0.4                                  | N/A                               |
| HL-9          | 77         | F        | Caucasian        | TT                 | 14±1.5                                 | N/A                               |
| HL-10         | N/A        | N/A      | Caucasian        | TT                 | 5±1.0                                  | N/A                               |
| HL-11         | 52         | F        | African-American | TT                 | 6±0.9                                  | N/A                               |
| HL-12         | 55         | F        | Caucasian        | TT                 | 15±2.8                                 | N/A                               |
| HL-13         | 57         | F        | Caucasian        | TT                 | 8±0.7                                  | N/A                               |
| HL-14         | 65         | M        | African-American | TT                 | 6±1.2                                  | N/A                               |
| HL-16         | 49         | F        | N/A              | TT                 | 6±0.7                                  | N/A                               |
| HL-17         | 70         | M        | N/A              | TT                 | 6±0.4                                  | N/A                               |
| Hu-895        | 69         | F        | Caucasian        | TT                 | N/A                                    | 19.02                             |
| <b>Hu-856</b> | <b>66</b>  | <b>M</b> | <b>Caucasian</b> | <b>TC</b>          | N/A                                    | <b>11.28</b>                      |
| Hu-613        | 69         | F        | Hispanic         | TT                 | N/A                                    | 4.43                              |
| Hu-825        | 55         | M        | Caucasian        | TT                 | N/A                                    | 14.34                             |
| Hu-840        | 66         | F        | Caucasian        | TT                 | N/A                                    | 13.75                             |
| Hu-680        | 41         | F        | Caucasian        | TT                 | N/A                                    | 8.07                              |
| Hu-843        | 53         | F        | Caucasian        | TT                 | N/A                                    | 11.56                             |
| <b>Hu-571</b> | <b>47</b>  | <b>F</b> | <b>Caucasian</b> | <b>TC</b>          | N/A                                    | <b>8.42</b>                       |
| Hu-690        | 31         | F        | African-American | TT                 | N/A                                    | 32.21                             |
| Hu-586        | 69         | F        | Caucasian        | TT                 | N/A                                    | 8.82                              |
| Hu-721        | 53         | F        | Caucasian        | TT                 | N/A                                    | 10.57                             |
| Hu-727        | 73         | F        | Caucasian        | TT                 | N/A                                    | 15.20                             |
| <b>Hu-788</b> | <b>65</b>  | <b>F</b> | <b>Caucasian</b> | <b>TC</b>          | N/A                                    | <b>24.45</b>                      |
| Hu-677        | 63         | F        | Caucasian        | TT                 | N/A                                    | 18.87                             |
| Hu-695        | 41         | F        | Caucasian        | TT                 | N/A                                    | 24.29                             |
| Hu-693        | 41         | M        | Caucasian        | TT                 | N/A                                    | 5.19                              |
| Hu-590        | 58         | M        | Caucasian        | TT                 | N/A                                    | 5.69                              |
| Hu-833        | 66         | M        | Caucasian        | TT                 | N/A                                    | 5.73                              |
| Hu-896        | 53         | F        | Caucasian        | TT                 | N/A                                    | 4.10                              |
| Hu-670        | 27         | F        | Hispanic         | TT                 | N/A                                    | 5.09                              |
| Hu-622        | 63         | F        | Caucasian        | TT                 | N/A                                    | 4.78                              |
| Hu-546        | 57         | F        | Caucasian        | TT                 | N/A                                    | 6.95                              |
| Hu-507        | 51         | M        | Caucasian        | TT                 | N/A                                    | 2.26                              |
| Hu-601        | 30         | F        | Caucasian        | TT                 | N/A                                    | 3.71                              |
| Hu-560        | 71         | F        | Caucasian        | TT                 | N/A                                    | 3.46                              |
| Hu-514        | 63         | M        | Hispanic         | TT                 | N/A                                    | 6.01                              |
| Hu-844        | 76         | F        | Caucasian        | TT                 | N/A                                    | 5.49                              |
| Hu-631        | 70         | M        | Caucasian        | TT                 | N/A                                    | 4.56                              |
| Hu-689        | 55         | F        | Caucasian        | TT                 | N/A                                    | 8.63                              |

N/A: not available.
